# Supplementary material for: Hydrothermal growth and characterization of large Rb2SnBr6 double perovskite crystals: a promising semiconductor material for photocatalysis and optoelectronics
Source: Royal Society of Chemistry journal article supplement (doi:10.1039/d4dt02712d), 2025-01-01
Supplement: d4dt02712d1.pdf [file d4dt02712d1.pdf]

### Supplementary Information

## Hydrothermal Growth and Characterization of Large $\text{Rb}_2\text{SnBr}_6$ Double Perovskite Crystals: A Promising Semiconductor Material for Photocatalysis and Optoelectronics

Rahidul Hasan<sup>1</sup>, Hafiz Zohaib Aslam<sup>1</sup>, Rutva Joshi<sup>1</sup>, Roger A. Lalancette<sup>1</sup>, Georgiy Akopov<sup>1,\*</sup>

<sup>1</sup>*Department of Chemistry, Rutgers University - Newark, Newark, NJ 07102, United States;*

\*Corresponding author: [georgiy.akopov@rutgers.edu](mailto:georgiy.akopov@rutgers.edu)

**Note about notation:** Going forward, we will use (Rb:Sn:X) ratio notation to indicate the nominal stoichiometry used where relevant:  $Rb_2SnBr_6$  (2:1:6) or  $Rb_2SnBr_6$  (4:3:10).

**Table S1.** Experimental results of several adopted techniques for fabricating the  $Rb_2SnBr_6$  halide double perovskite.

| Synthesis technique | Hydrothermal            |                         | Evaporation             |                         |
|---------------------|-------------------------|-------------------------|-------------------------|-------------------------|
|                     | Solvent                 | H <sub>2</sub> O        | H <sub>2</sub> O        | H <sub>2</sub> O        |
| Temperature (°C)    | 220                     | 150                     | 120                     | 120                     |
| Crystal size        | Centimeter              | Millimeter              | Micron                  | Micron                  |
| Crystal Color       | Light Yellow            | Light Yellow            | Dark Brown              | Dark Yellow             |
| Product Stability   | Air and moisture stable |
| Phase formed        | $Rb_2SnX_6$ , $Fm-3m$   |                         |                         |                         |

**Table S2.** The unit cell dimension of the pristine, 50% Cl-doped and 10% I-doped  $Rb_2SnBr_6$

| Sample                      | $Rb_2SnBr_6$ (2:1:6) | $Rb_2SnBr_3Cl_3$ (2:1:6) | $Rb_2SnBr_{5.5}I_{0.5}$ (2:1:6) |
|-----------------------------|----------------------|--------------------------|---------------------------------|
| Space group                 | $Fm-3m$              | $Fm-3m$                  | $Fm-3m$                         |
| a (Å)                       | 10.678               | 10.57478                 | 10.77                           |
| Rwp (%)                     | 4.38                 | 3.7                      | 4.67                            |
| Volume (Å <sup>3</sup> )    | 1217.71              | 1182.53                  | 1251.48                         |
| $\alpha = \beta = \gamma =$ | 90                   | 90                       | 90                              |

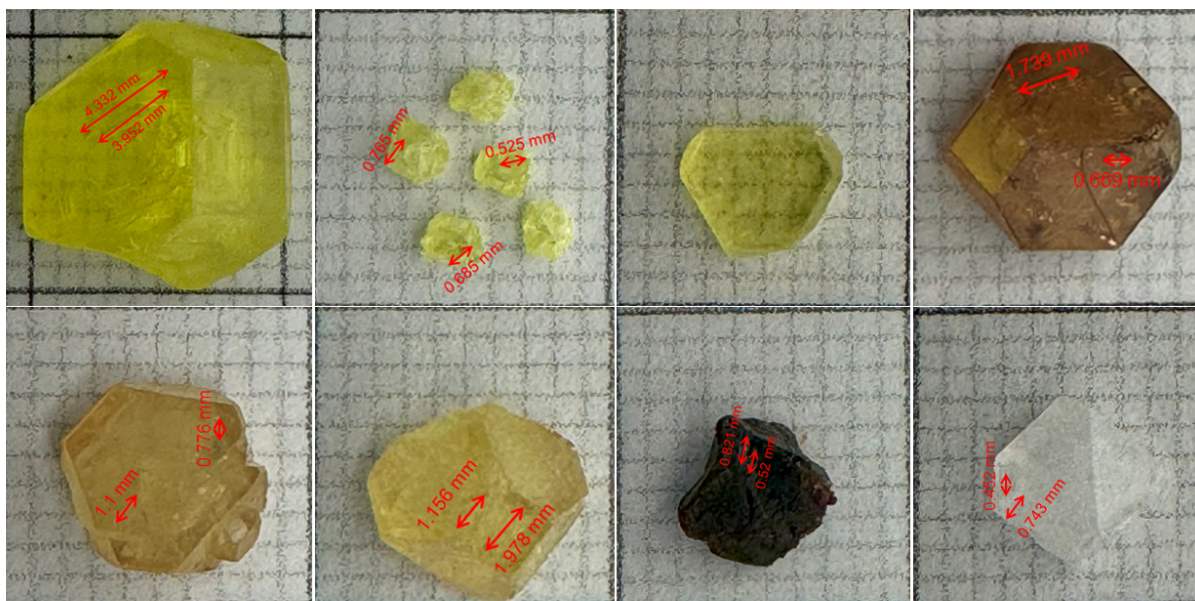

**Figure S1:** The measured crystal domain size of the single crystal in **(a)**  $\text{Rb}_2\text{SnBr}_6$  (4:3:10), **(b)**  $\text{Rb}_2\text{SnBr}_6$  (2:1:6), **(c)**  $\text{Rb}_2\text{SnBr}_{5.4}\text{Cl}_{0.6}$  (2:1:6), **(d)**  $\text{Rb}_2\text{SnBr}_{4.5}\text{Cl}_{1.5}$  (2:1:6), **(e)**  $\text{Rb}_2\text{SnBr}_3\text{Cl}_3$  (2:1:6), **(f)**  $\text{Rb}_2\text{SnBr}_{1.5}\text{Cl}_{4.5}$  (2:1:6), **(g)**  $\text{Rb}_2\text{SnBr}_{5.5}\text{I}_{0.5}$  (2:1:6), and **(h)**  $\text{Rb}_2\text{SnCl}_6$  (2:1:6). The grid is 1x1 mm<sup>2</sup>.

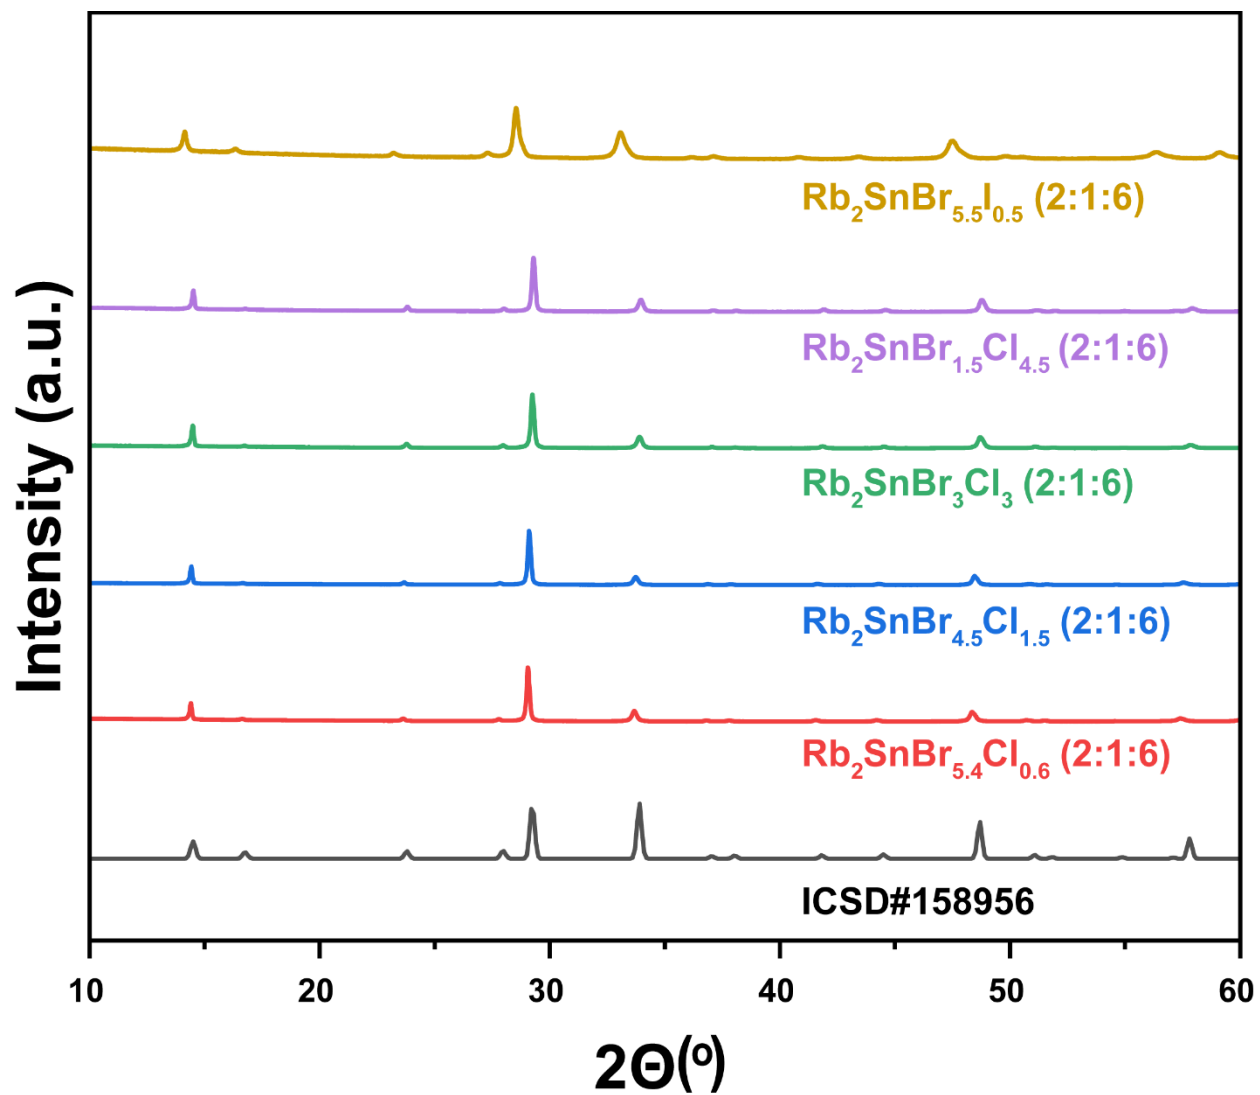

Figure S2. Powder XRD data for Cl- and I-doped  $\text{Rb}_2\text{SnBr}_6$  (2:1:6).

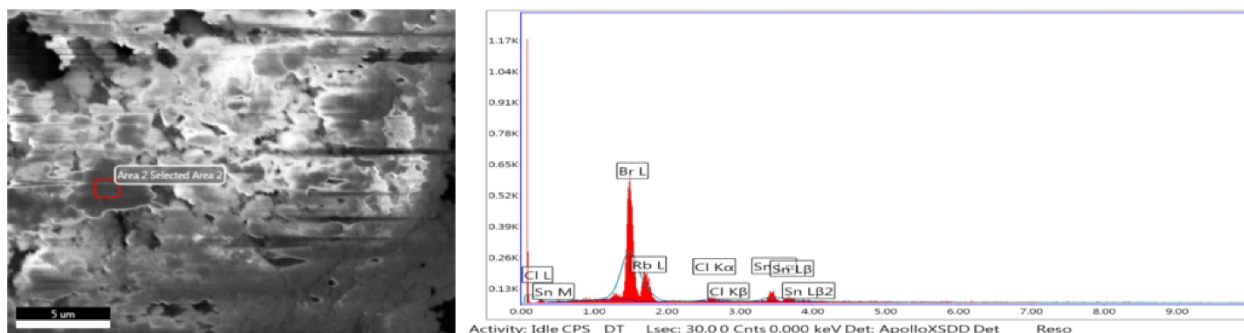

**Table. EDS single point analysis of the Cl-doped  $\text{Rb}_2\text{SnBr}_{4.5}\text{Cl}_{1.5}$  (2:1:6)**

| Element                  | At. %                                                                                                     |
|--------------------------|-----------------------------------------------------------------------------------------------------------|
| Rb                       | 17.03                                                                                                     |
| Sn                       | 12.38                                                                                                     |
| Br                       | 62.06                                                                                                     |
| Cl                       | 8.53                                                                                                      |
| Total                    | 100                                                                                                       |
| Experimental composition | $\text{Rb}_{1.99(\pm 0.5\%)}\text{Sn}_{1.04(\pm 4\%)}\text{Br}_{7.76(\pm 72\%)}\text{Cl}_{2.4(\pm 60\%)}$ |

**Figure S3.** Energy-dispersive X-ray spectroscopy (EDS) single spot analysis of the  $\text{Rb}_2\text{SnBr}_{4.5}\text{Cl}_{1.5}$  (2:1:6) powder sample.

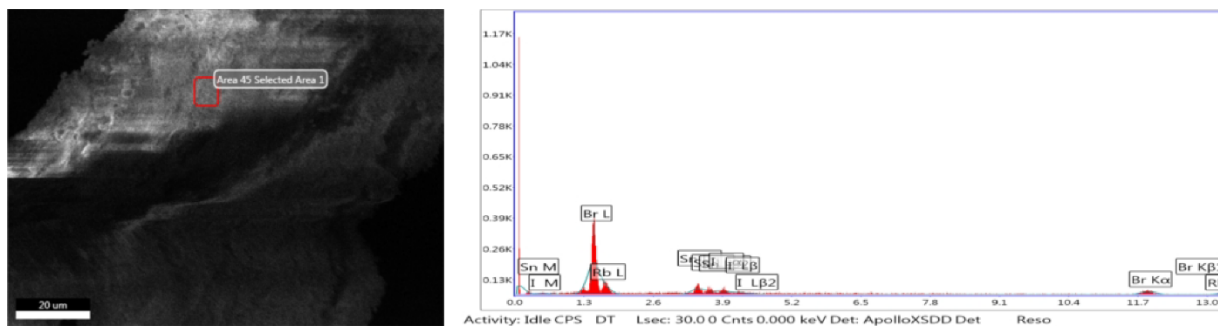

**Table. EDS point analysys of the I-doped  $\text{Rb}_2\text{SnBr}_{5.4}\text{I}_{0.6}$  (2:1:6)**

| Element                  | At. %                                                                                                     |
|--------------------------|-----------------------------------------------------------------------------------------------------------|
| Rb                       | 16.15                                                                                                     |
| Sn                       | 16.09                                                                                                     |
| Br                       | 58.36                                                                                                     |
| I                        | 9.4                                                                                                       |
| Total                    | 100                                                                                                       |
| Experimental composition | $\text{Rb}_{1.88(\pm 6\%)}\text{Sn}_{1.35(\pm 35\%)}\text{Br}_{7.3(\pm 35.18\%)}\text{I}_{0.7(\pm 16\%)}$ |

**Figure S4.** Energy-dispersive X-ray spectroscopy (EDS) analysis of the powder sample of the  $\text{Rb}_2\text{SnBr}_{5.4}\text{I}_{0.6}$  (2:1:6) .

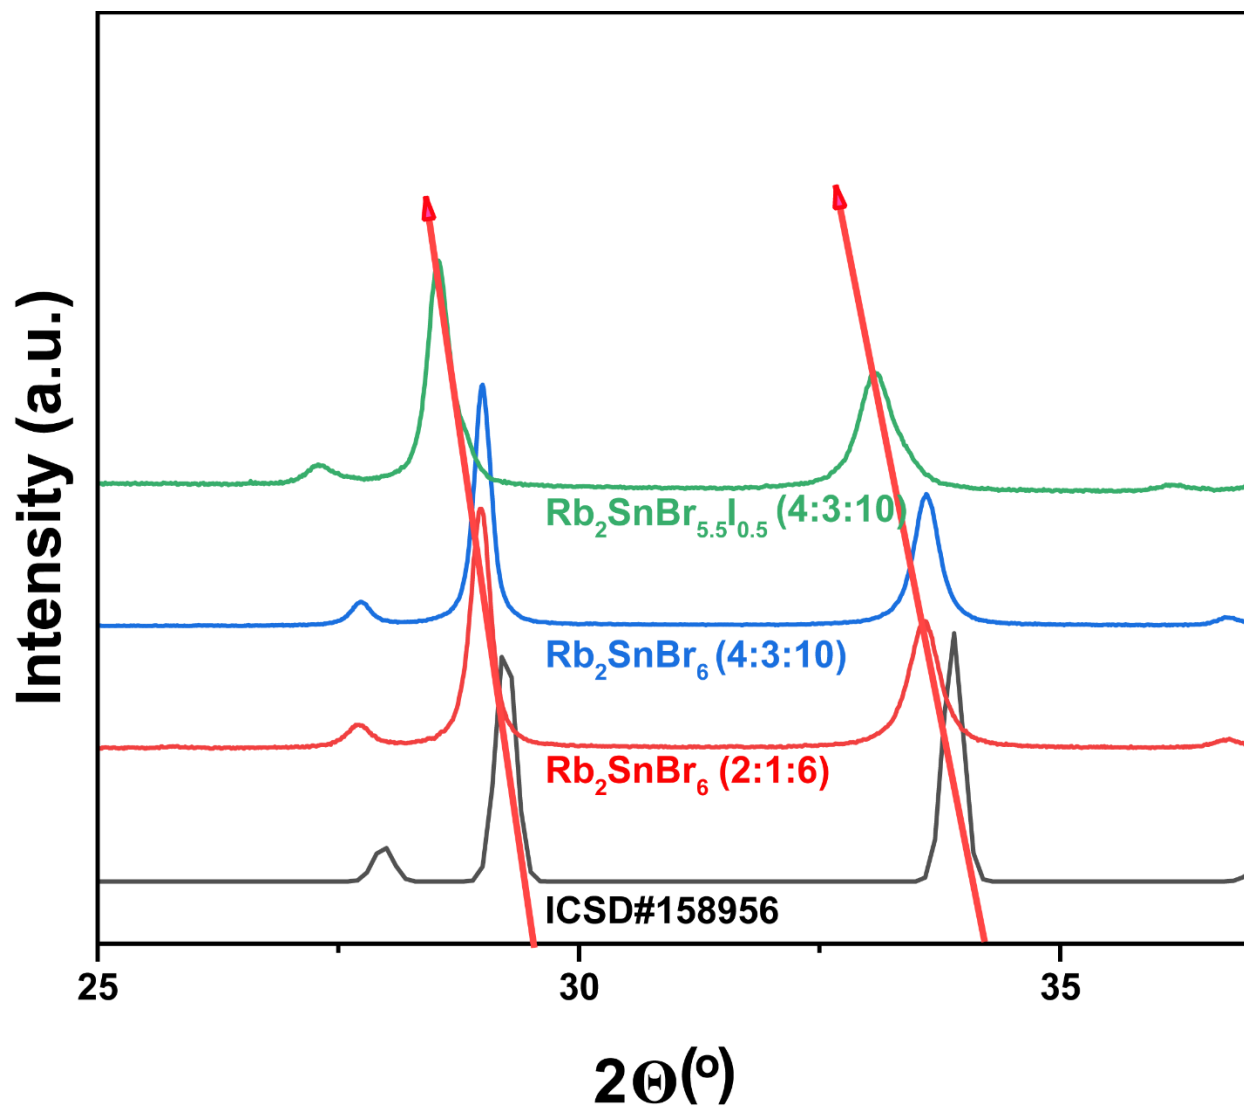

Figure S5. Lower angle peak shifting of the pristine and doped Rb<sub>2</sub>SnBr<sub>6</sub>.



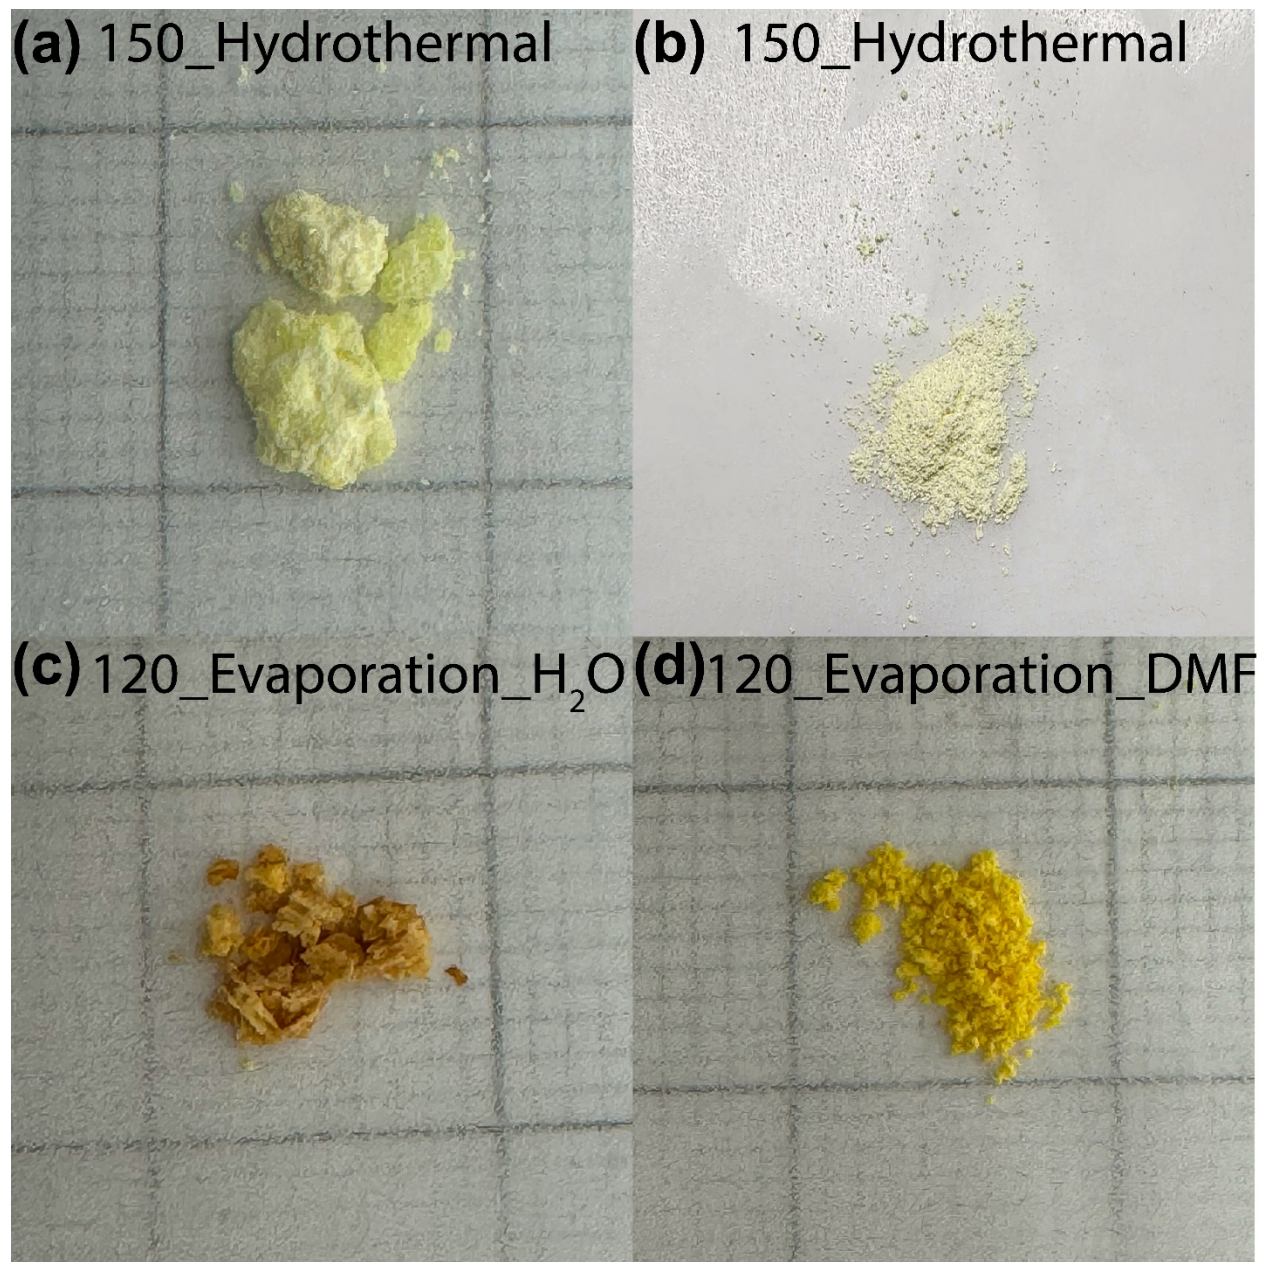

**Figure S6.** Extracted powder samples from the low-temperature process for the fabrication of  $\text{Rb}_2\text{SnBr}_6$ ; **(a)**  $\text{Rb}_2\text{SnBr}_6$  (2:1:6) from hydrothermal process ( $T = 150^\circ\text{C}$ ,  $\text{H}_2\text{O}$ ); **(b)**  $\text{Rb}_2\text{SnBr}_6$  (4:3:10) from hydrothermal process ( $T = 150^\circ\text{C}$ ,  $\text{H}_2\text{O}$ ); **(c)**  $\text{Rb}_2\text{SnBr}_6$  (2:1:6) from evaporation process ( $T = 120^\circ\text{C}$ ,  $\text{H}_2\text{O}$ ); and **(d)**  $\text{Rb}_2\text{SnBr}_6$  (2:1:6) from evaporation process ( $T = 120^\circ\text{C}$ , DMF).



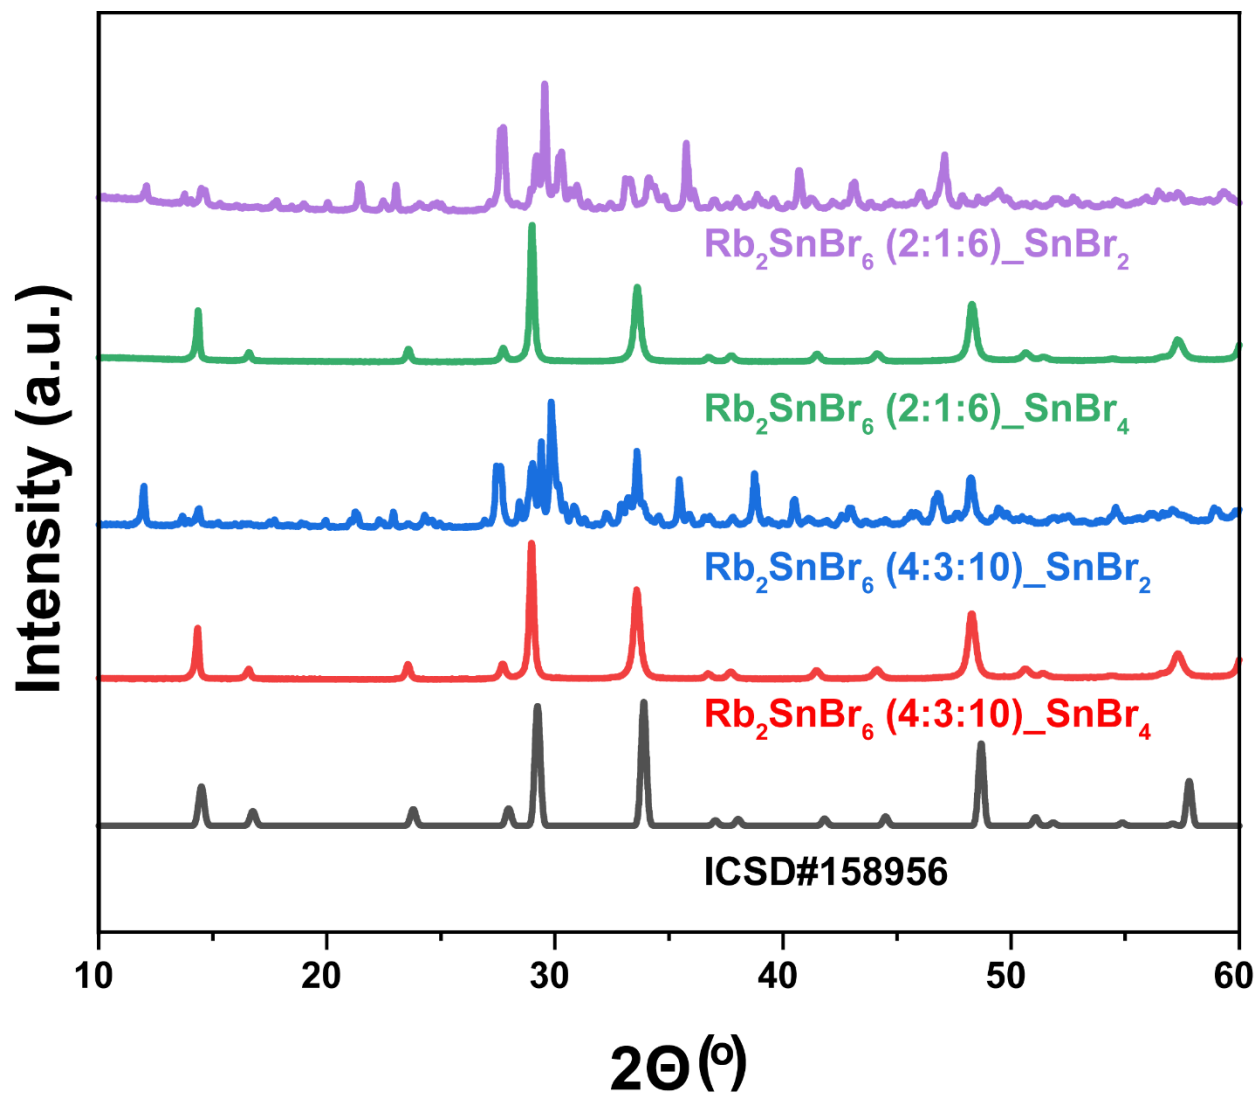

**Figure S7.** PXRD analysis of the low-temperature synthesis compositions of  $\text{Rb}_2\text{SnBr}_6$  (2:1:6) and  $\text{Rb}_2\text{SnBr}_6$  (4:3:10) from the  $\text{SnBr}_2$  and  $\text{SnBr}_4$  salts as Sn sources. The unidentified peaks in the XRD plots of  $\text{Rb}_2\text{SnBr}_6$  (4:3:10) are from the corresponding raw materials peaks of  $\text{SnBr}_2$  and  $\text{SnBr}_4$ .

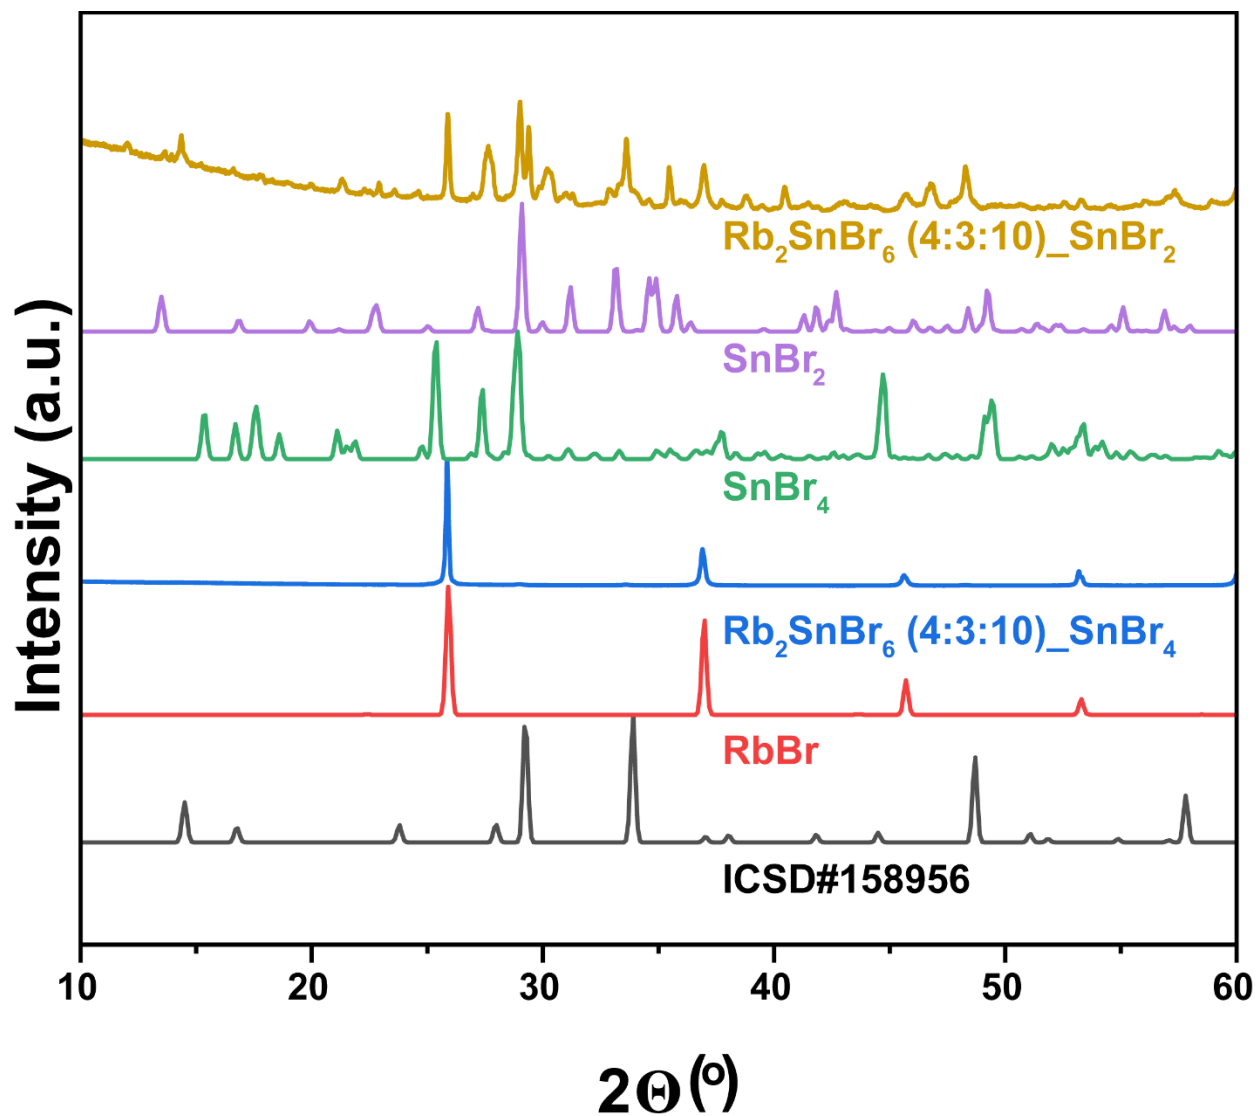

**Figure S8.** Powder XRD data for the Hydrothermal process (120 °C) to synthesize  $\text{Rb}_2\text{SnBr}_6$  (4:3:10) single crystal. The unidentified peaks in the XRD plots of  $\text{Rb}_2\text{SnBr}_6$  (4:3:10) are from the corresponding raw materials peaks of  $\text{SnBr}_2$  and  $\text{SnBr}_4$ .

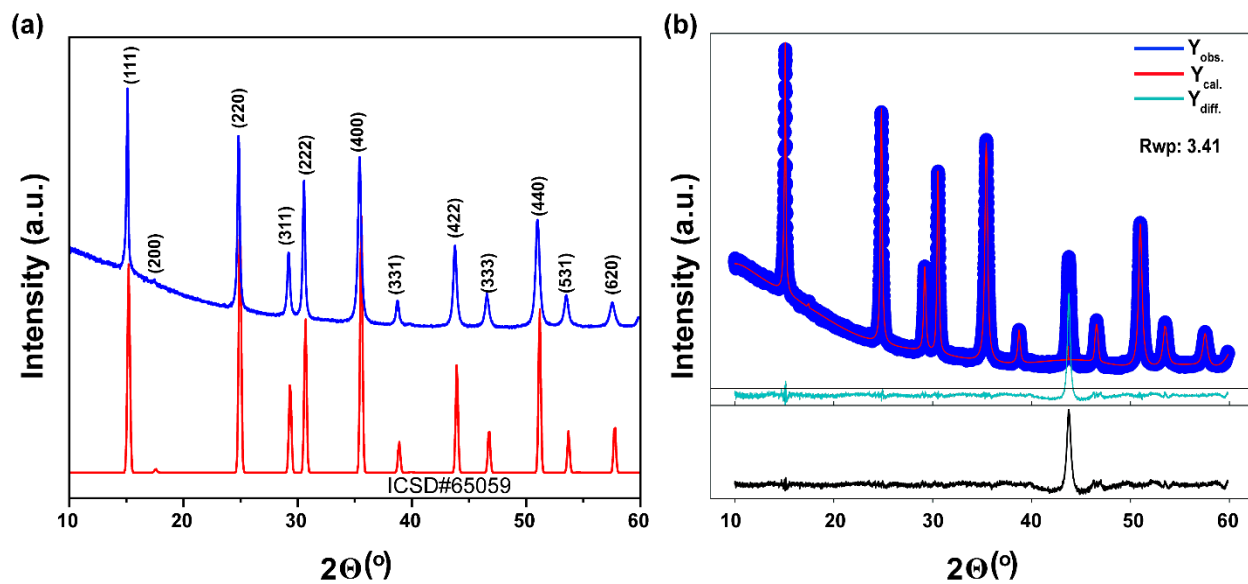

**Figure S9.** It has analyzed Powder crystal XRD of  $\text{Rb}_2\text{SnCl}_6$  and its Rietveld refinement crystal structure synthesized by hydrothermal process ( $Fm-3m$ ,  $a = 10.14 \text{ \AA}$ ,  $V^3 = 1042.68 \text{ \AA}^3$ ,  $R_{wp} = 3.41$ ).

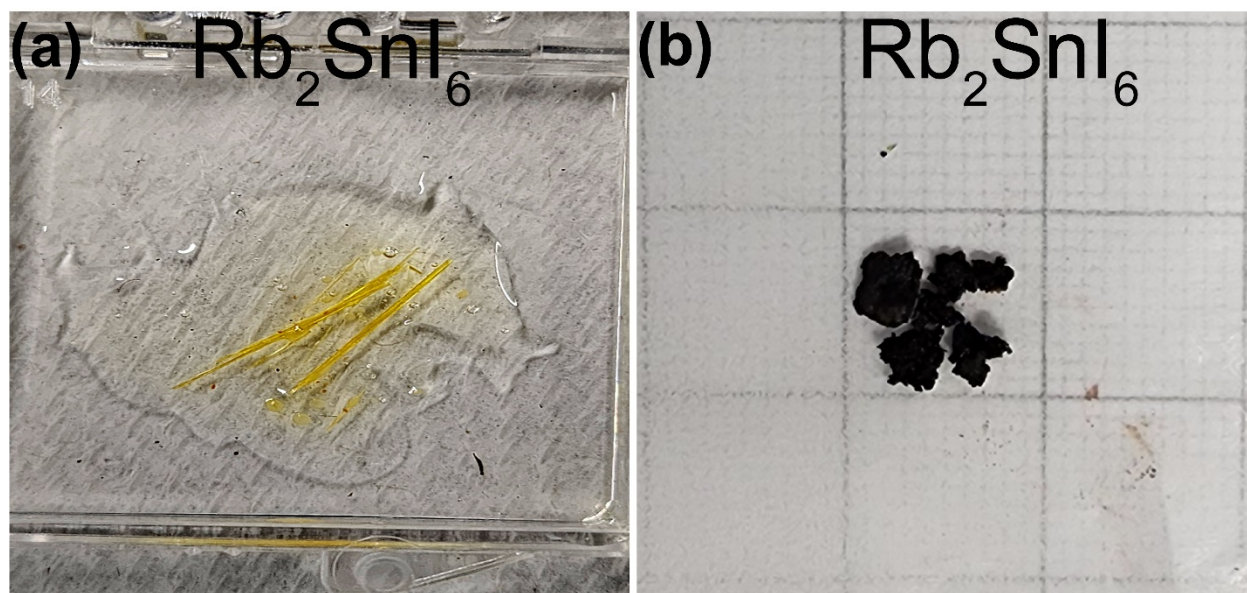

**Figure S10.** Hydrothermal synthesized crystals of (a) as-synthesized  $\text{Rb}_2\text{SnI}_6$  and (b) oxidized product of  $\text{Rb}_2\text{SnI}_6$ .

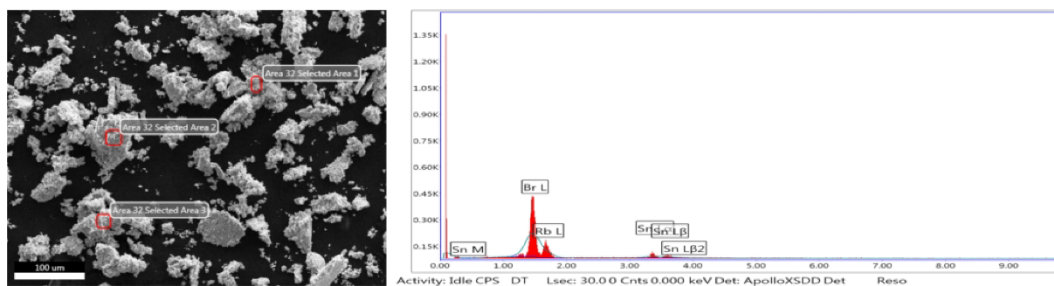

**Table. Three point EDS analysis of the  $\text{Rb}_2\text{SnBr}_6$  (2:1:6) crystal powder.**

| Selected point | Elements                 | At. %                                                                            |
|----------------|--------------------------|----------------------------------------------------------------------------------|
| Point 1        | Rb                       | 21.09                                                                            |
|                | Sn                       | 15.97                                                                            |
|                | Br                       | 62.93                                                                            |
|                | Total                    | 100                                                                              |
|                | Experimental composition | $\text{Rb}_{2.46(\pm 21\%)}\text{Sn}_{1.35(\pm 35\%)}\text{Br}_{7.87(\pm 31\%)}$ |
| Point 2        | Rb                       | 13.31                                                                            |
|                | Sn                       | 13.12                                                                            |
|                | Br                       | 73.57                                                                            |
|                | Total                    | 100                                                                              |
|                | Experimental composition | $\text{Rb}_{1.56(\pm 22\%)}\text{Sn}_{1.1(\pm 10\%)}\text{Br}_{9.2(\pm 53\%)}$   |
| Point 3        | Rb                       | 16.39                                                                            |
|                | Sn                       | 19.25                                                                            |
|                | Br                       | 64.36                                                                            |
|                | Total                    | 100                                                                              |
|                | Experimental composition | $\text{Rb}_{1.92(\pm 4\%)}\text{Sn}_{1.6(\pm 60\%)}\text{Br}_{8.05(+34\%)}$      |

**Figure S11.** Three-point energy-dispersive X-ray spectroscopy (EDS) analysis of the powder sample of the  $\text{Rb}_2\text{SnBr}_6$  (R2).

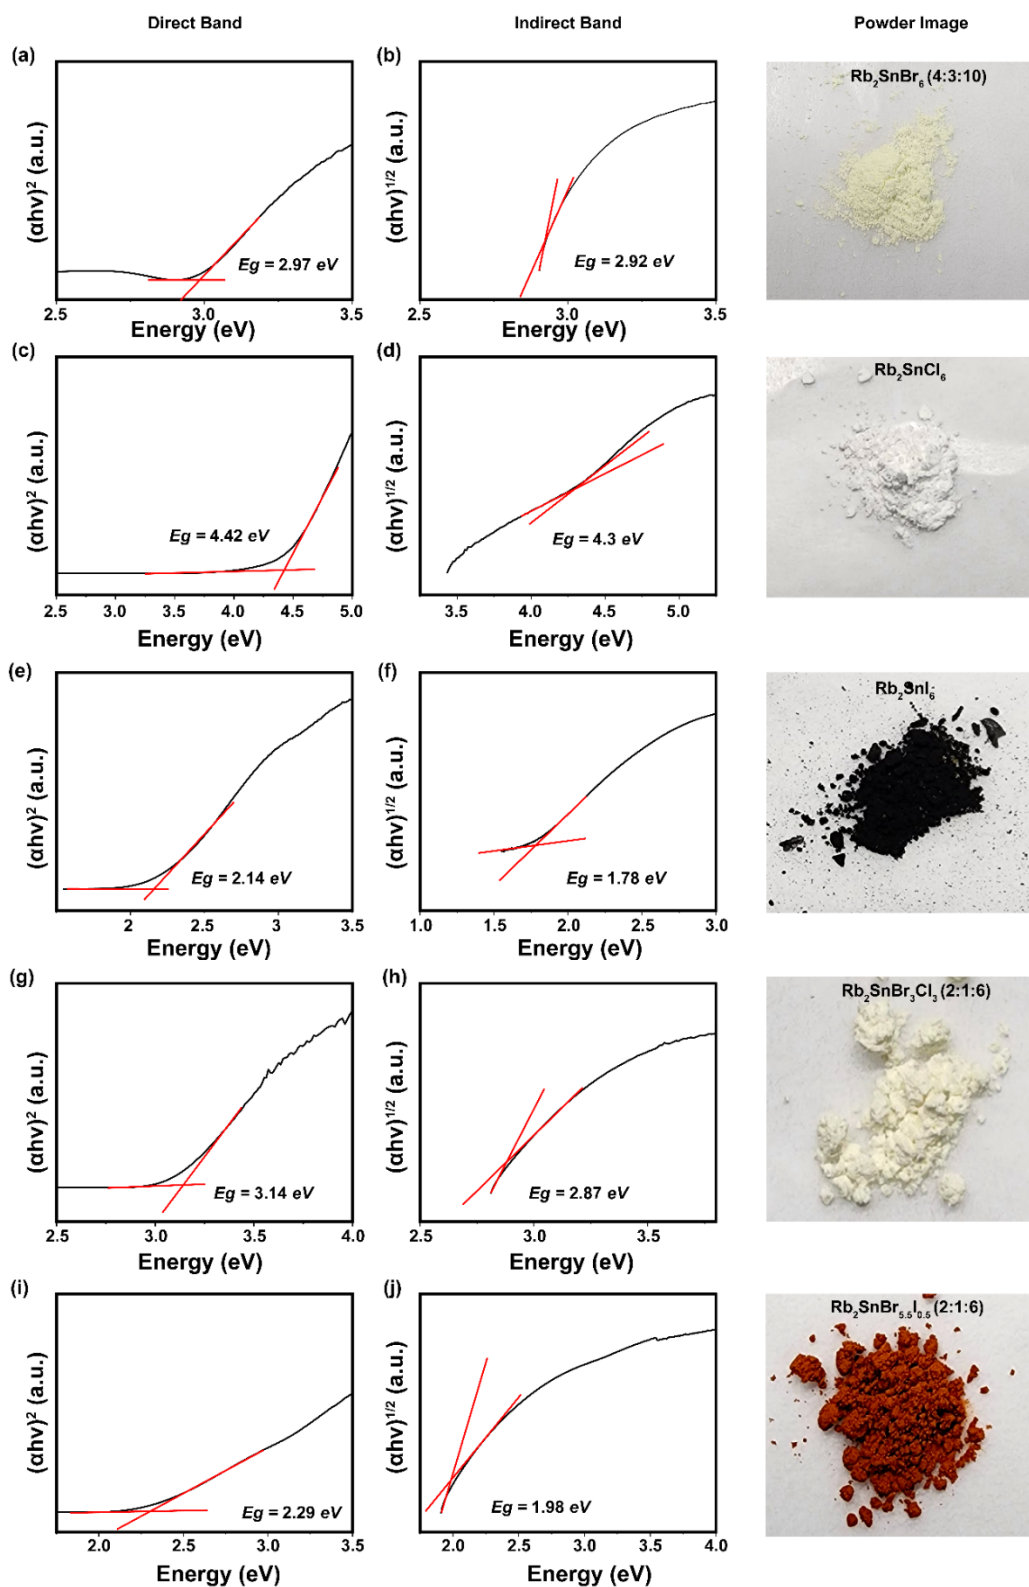

**Figure S12.** Calculated direct and indirect optical bandgap of the pristine and doped  $\text{Rb}_2\text{SnBr}_6$  (2:1:6) from powder samples using the UV-absorption data: (a,b)  $\text{Rb}_2\text{SnBr}_6$  (2:1:6), (c,d)  $\text{Rb}_2\text{SnCl}_6$ , (e,f)  $\text{Rb}_2\text{SnI}_6$ , (g,h)  $\text{Rb}_2\text{SnBr}_3\text{Cl}_3$  and (g,h)  $\text{Rb}_2\text{SnBr}_{5.5}\text{Cl}_{0.5}$ .

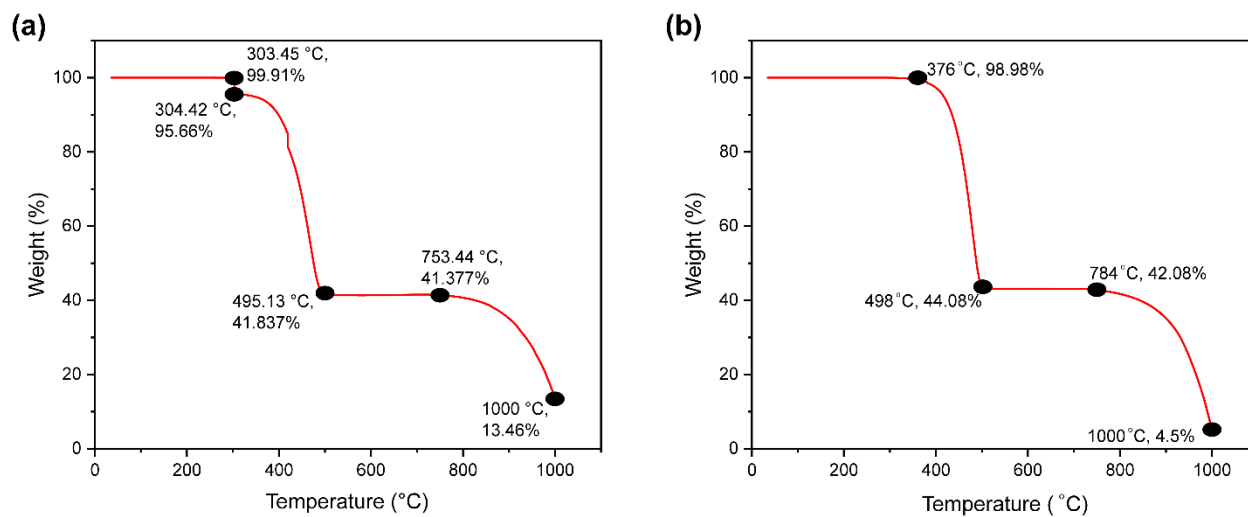

**Figure S13.** Thermogravimetric analysis (TGA) of the Rb<sub>2</sub>SnBr<sub>6</sub> halide double perovskite single crystals; (a) Rb<sub>2</sub>SnBr<sub>6</sub> (2:1:6) (b) Rb<sub>2</sub>SnBr<sub>6</sub> (4:3:10).
